# Supplementary material
Source: publisher figshare collection journal article supplement (https://f1000.figshare.com/ndownloader/files/1657383)
Supplement: Supplementary file 1 [file 1657383]

PRE-TEST/POST-TEST DATASET
CODE #	Topic I: Dyspnea			Topic II: CP			Topic III: Fever			Topic IV: Abdominal Pain			Topic V: Shock			Topic VI: AMS			Topic VII: Syncope			Topic VIII: Jaundice			Topic IX: Dizziness			Topic X: Anemia			Topic XI: AKI			Topic XII: LFT's
	Pre-Test	Post-Test	Change	Pre-Test	Post-Test	Change	Pre-Test	Post-Test	Change	Pre-Test	Post-Test	Change	Pre-Test	Post-Test	Change	Pre-Test	Post-Test	Change	Pre-Test	Post-Test	Change	Pre-Test	Post-Test	Change	Pre-Test	Post-Test	Change	Pre-Test	Post-Test	Change	Pre-Test	Post-Test	Change	Pre-Test	Post-Test	Change
1				2	5					3	4		4	4					1	3								1	1		3	3		1	2		1
2	3	3					3	4											4	4					4	5											2
3	4	4											4	4		3	3														3	4					3
4	2	3											3	3		1	2								2	3		3	2					4	4		4
5	4	1					4	3		4	4								2	4					2	3		3	4								5
6				2	2								1	1		1	2											2	2								6
7	4	5											3	5		1	2								3	4		2	4								7
8				1	3		2	4					2	3		2	3																				8
9													1	4								2	2		2	4					2	4		4	4		9
10				2	3					3	4					2	1											2	3		3	4					10
11	4	5					4	5					2	2					1	3								4	5								11
12	2	4					1	2		3	3								4	3					1	2											12
13	5	5														0	1														2	4					13
14	1	2					1	3								2	2		3	3					3	4											14
15	1	4					2	4								2	2					2	4					3	5					4	3		15
16							2	4											2	4		1	3											1	1		16
17										3	5					2	4					1	3														17
18							1	3											3	4					3	3											18
19							3	2					2	2					3	2																	19
20																3	2																				20
21							3	4					3	5					3	4					4	4		2	3								21
22							2	3					4	5																							22
23	4	5											4	5					3	2								1	3		3	4					23
24	3	4					1	2											1	3																	24
25	1	4																	1	3																	25
26																						1	2					3	4								26
27				3	3					4	5																	5	4								27
28													3	5					3	4																	28
29				1	1																	2	2					2	4								29
30	3	3																							5	5											30
31																4	5								3	3		5	5		4	4					31
32							2	2					2	4											3	4		1	2								32
33				1	4											3	2																	3	5		33
34				2	2					4	4														4	3		1	4					2	4		34
35																3	3											2	4					3	3		35
36																															3	5					36
37				2	4											2	3					2	3														37
38	3	3											2	3											2	2					2	3					38
39				0	2					4	5											1	3		2	3											39
40				1	3					3	4											1	4		2	3		3	5								40
41				3	4					4	5											2	3					2	3								41
42				3	4																	2	1		4	3											42
43																									2	5					2	5					43
44																																					44
AVG CH.	2.93333	3.66667	0.7	1.769230769	3.076923077	1.3	2.214286	3.214286	1	3.5	4.3	0.8	2.66667	3.666667	1	2.066667	2.466667	0.4	2.428571	3.285714	0.86	1.5	2.7	1.2	2.833333333	3.5	0.67	2.473684211	3.526315789	1.05	2.7	4	1.3	2.75	3.25	0.5
